# Supplementary material for: Hearing Loss and Urinary trans,trans-Muconic Acid (t,t-MA) in 6- to 19-Year-Old Participants of NHANES 2017–March 2020
Source: MDPI journal article supplement (doi:10.3390/toxics12030191), 2024-02-29
Supplement: s1 [file s1]

# Hearing Loss and Urinary *trans,trans*-Muconic Acid (*t,t*-MA) in 6- to 19-Year-Old Participants of NHANES 2017–March 2020

Rae T. Benedict <sup>1,\*</sup>, Franco Scinicariello <sup>1</sup>, Henry G. Abadin <sup>1</sup>, Gregory M. Zarus <sup>1</sup> and Roberta Attanasio <sup>2</sup>

**Table S1.** Logistic regression ORs (95% CI) of slight hearing loss outcomes and urinary *t,t*-MA<sup>a</sup> levels for US participants 6–19 year-old participants of NHANES 2017–March 2020.

|                                  | Slight Speech Frequency<br>Hearing Loss >15dB<br>(SFHL) | Slight High Frequency<br>Hearing Loss >15dB<br>(HFHL) | Any Slight Hearing<br>Loss >15dB |
|----------------------------------|---------------------------------------------------------|-------------------------------------------------------|----------------------------------|
|                                  | Crude Model                                             | Crude Model                                           | Crude Model                      |
| Case/control, <i>n</i>           | 48/636                                                  | 77/604                                                | 89/597                           |
| <i>t,t</i> -MA (natural log)     | 1.47 (1.01, 2.12)*                                      | 1.47 (1.09, 1.99)*                                    | 1.41 (1.05, 1.91)*               |
| <i>t,t</i> -MA doubling          | 1.30 (1.01, 1.68)*                                      | 1.31 (1.06, 1.61)*                                    | 1.27 (1.03, 1.56)*               |
| <i>t,t</i> -MA Quartiles (ng/mL) |                                                         |                                                       |                                  |
| Q1: ≤ 29.17                      | 1 (referent)                                            | 1 (referent)                                          | 1 (referent)                     |
| Q2: 29.18-61.51                  | 0.76 (0.22, 2.61)                                       | 1.20 (0.39, 3.71)                                     | 0.94 (0.36, 2.46)                |
| Q3: 61.52-156.50                 | 0.65 (0.16, 2.62)                                       | 2.00 (0.44, 9.11)                                     | 1.74 (0.48, 6.37)                |
| Q4: >156.50                      | 3.08 (1.07, 8.87)*                                      | 4.11 (1.35, 12.53)*                                   | 3.25 (1.20, 8.80)*               |
| <i>p</i> -trend                  | 0.01*                                                   | 0.0046*                                               | 0.007*                           |

<sup>a</sup> *t,t*-MA has been weighted using specific sample weights for the subsample, WTVOC2PP, as recommended by NCHS [21].

Crude model does not adjust for any confounders. \*Indicates associations with statistical significance (*p*<0.05).

**Table S2.** Multivariate logistic regression adjusted ORs (95% CI) of mild hearing loss outcomes and urinary *t,t*-MA<sup>a</sup> quartiles for US participants 6–19 year-old participants of NHANES 2017–March 2020.

|                                  | Mild Speech Frequency Hearing<br>Loss >20dB (SFHL) |                    | Mild High Frequency Hearing<br>Loss >20dB (HFHL) |                    | Any Mild Hearing Loss >20dB |                    |
|----------------------------------|----------------------------------------------------|--------------------|--------------------------------------------------|--------------------|-----------------------------|--------------------|
|                                  | Model 1                                            | Model 2            | Model 1                                          | Model 2            | Model 1                     | Model 2            |
| Case/control, <i>n</i>           | 20/664                                             | 17/572             | 31/650                                           | 28/557             | 34/652                      | 31/559             |
| <i>t,t</i> -MA Quartiles (ng/mL) |                                                    |                    |                                                  |                    |                             |                    |
| Q1: ≤ 29.17                      | 1 (referent)                                       | 1 (referent)       | 1 (referent)                                     | 1 (referent)       | 1 (referent)                | 1 (referent)       |
| Q2: 29.18-61.51                  | 1.06 (0.12, 9.46)                                  | 1.29 (0.09, 18.93) | 0.97 (0.20, 4.69)                                | 1.16 (0.16, 8.38)  | 0.97 (0.20, 4.74)           | 1.10 (0.15, 8.14)  |
| Q3: 61.52-156.50                 | 0.14 (0.01, 1.63)                                  | – <sup>b</sup>     | 0.19 (0.04, 0.96)                                | 0.12 (0.01, 0.98)  | 0.20 (0.04, 1.00)           | 0.12 (0.01, 0.98)  |
| Q4: >156.50                      | 4.69 (0.75, 29.27)                                 | 7.75 (1.01, 59.66) | 4.35 (1.13, 16.69)                               | 5.93 (1.18, 29.75) | 4.67 (1.24, 17.55)          | 6.27 (1.27, 31.04) |
| <i>p</i> -trend                  | 0.008*                                             | 0.001*             | 0.0001*                                          | 0.0005*            | 0.005*                      | 0.0004*            |

<sup>a</sup> *t,t*-MA has been weighted using specific sample weights for the subsample, WTVOC2PP, as recommended by NCHS [21]. Model 1 adjusted for age, sex, people from racial and ethnic groups, poverty income ratio (PIR), body weight status (normal/underweight, overweight, and obesity), self-reported ear infection, loud noise exposure and urinary creatinine. Model 2 is model 1 plus serum cotinine. <sup>b</sup>Adjusted OR was not possible because there are zero cases in the third quartile. \*Indicates associations with statistical significance (*p*<0.05).
